# Supplementary material for: BIM and mTOR expression levels predict outcome to erlotinib in EGFR-mutant non-small-cell lung cancer
Source: PubMed Central journal article supplement (PMC4671004; doi:10.1038/srep17499), 2015-12-07
Supplement: srep17499-s1.pdf [file srep17499-s1.pdf]

## **BIM and mTOR expression levels predict outcome to erlotinib in EGFR-mutant non-small-cell lung cancer**

Niki Karachaliou<sup>1</sup>, Jordi Codony-Servat<sup>2</sup>, Cristina Teixido<sup>2</sup>, Sara Pilotto<sup>3</sup>, Ana Drozdowskyj<sup>4</sup>, Carles Codony-Servat<sup>2</sup>, Ana Gimenez-Capitan<sup>2</sup>, Miguel Angel Molina-Vila<sup>2</sup>, Jordi Bertran-Alamillo<sup>2</sup>, Radj Gervais<sup>5</sup>, Bartomeu Massuti<sup>6</sup>, Teresa Moran<sup>7</sup>, Margarita Majem<sup>8</sup>, Enriqueta Felip<sup>9</sup>, Enric Carcereny<sup>7</sup>, Rosario Garcia-Campelo<sup>10</sup>, Santiago Viteri<sup>1</sup>, Maria Gonzalez Cao<sup>1</sup>, Daniela Morales-Espinosa<sup>1</sup>, Alberto Verlicchi<sup>11</sup>, Elisabetta Crisetti<sup>12</sup>, Imane Chaib<sup>7</sup>, Mariacarmela Santarpia<sup>13</sup>, Jose Luis Ramirez<sup>7</sup>, Joaquim Bosch-Barrera<sup>14</sup>, Andres Felipe Cardona<sup>15</sup>, Filippo de Marinis<sup>16</sup>, Guillermo Lopez Vivanco<sup>17</sup>, Jose Miguel Sanchez<sup>18</sup>, Alain Vergnenegre<sup>19</sup>, Jose Javier Sanchez Hernandez<sup>20</sup>, Isabella Sperduti<sup>21</sup>, Emilio Bria<sup>3</sup>, \*Rafael Rosell<sup>1,2,7,22,23</sup>

<sup>1</sup>Instituto Oncológico Dr Rosell, Quiron-Dexeus University Hospital, Barcelona, Spain; <sup>2</sup>Pangaea Biotech, Barcelona, Spain; <sup>3</sup>Department of Medical Oncology, University of Verona, Azienda Ospedaliera Universitaria Integrata, Verona, Italy; <sup>4</sup>Pivotal, Madrid, Spain; <sup>5</sup>Centre François Baclesse, Caen, France; <sup>6</sup>Hospital General de Alicante, Alicante, Spain; <sup>7</sup>Catalan Institute of Oncology, Hospital Germans Trias i Pujol, Badalona, Spain; <sup>8</sup>Hospital de Sant Pau, Barcelona; <sup>9</sup>Hospital Vall d'Hebron, Barcelona, Spain; <sup>10</sup>Complejo Hospitalario Universitario La Coruña, Spain; <sup>11</sup>Ospedale Santa Maria delle Croci, Ravenna, Italy; <sup>12</sup>Department of Medical and Surgical Sciences, Institute of Respiratory Diseases, University of Foggia, Italy; <sup>13</sup>Medical Oncology Unit, Human Pathology Department, University of Messina, Italy; <sup>14</sup>Catalan Institute of Oncology, Hospital Josep Trueta, Girona, Spain, <sup>15</sup>Clinical and Translational Oncology Group, Institute of Oncology, Clínica del Country, Bogotá, Colombia; <sup>16</sup>Direttore, Divisione di Oncologica Toracica, Istituto Europeo di Oncologia – IEO, Milano, Italy; <sup>17</sup>Chief, Medical Oncology Service, Hospital de Cruces, Barakaldo, Vizcaya, Spain; <sup>18</sup>Medical Oncology Service, Hospital de la Princesa, Madrid, Spain; <sup>19</sup>Hôpital du Cluzeau, Limoges, France; <sup>20</sup>Unidad de Investigación en Salud Pública CIDICS-UANL, <sup>21</sup>Biostatistics, Regina Elena National Cancer Institute, Rome, <sup>22</sup>Molecular Oncology Research (MORE) Foundation, Barcelona, Spain; <sup>23</sup>Germans Trias i Pujol Health Sciences Institute and Hospital, Campus Can Ruti

## Supplementary Material

**Supplementary Table 1.** Patient characteristics of the 19 patients included in the validation cohort

| Clinical parameter           | N(%)       |
|------------------------------|------------|
| <b>Sex</b>                   |            |
| Female                       | 14 (73.7)  |
| Male                         | 5 (26.3)   |
| <b>Age group</b>             |            |
| <65 years                    | 11 (77.9)  |
| >= 65 years                  | 8 (42.1)   |
| <b>Smoking status</b>        |            |
| Never smoker                 | 15 (78.9)  |
| Former smoker                | 3 (15.8)   |
| Current Smoker               | 1 (5.3)    |
| <b>ECOG PS</b>               |            |
| 0-1                          | 12 (63.2)  |
| 2                            | 7 (36.8)   |
| <b>Histologic Diagnosis</b>  |            |
| Adenocarcinoma               | 19 (100.0) |
| <b>Clinical Stage</b>        |            |
| IIIA                         | 1 (5.3)    |
| IIIB                         | 2 (10.5)   |
| IV                           | 16 (84.2)  |
| <b>Bone metastasis</b>       |            |
| Yes                          | 9 (47.4)   |
| No                           | 10 (52.6)  |
| <b>Brain metastasis</b>      |            |
| Yes                          | 7 (36.8)   |
| No                           | 12 (63.2)  |
| <b>Other metastasis</b>      |            |
| Yes                          | 12 (63.2)  |
| No                           | 7 (36.8)   |
| <b>Type of EGFR mutation</b> |            |
| del19                        | 12 (63.2)  |
| L858R                        | 7 (36.8)   |
| <b>Type of EGFR TKI</b>      |            |
| Erlotinib                    | 13 (68.4)  |
| Gefitinib                    | 5 (26.3)   |
| Afatinib                     | 1 (5.3)    |
| <b>Response</b>              |            |
| Complete response            | 2 (10.5)   |
| Partial response             | 10 (52.6)  |
| Stable disease               | 7 (36.8)   |

**Supplementary Table 2:** Univariate analyses of progression-free and overall survival in 57 patients from the EURTAC trial included in the present study.

| Variable                       | PFS               |       | OS                |       |
|--------------------------------|-------------------|-------|-------------------|-------|
|                                | HR (95%CI)        | P     | HR (95%CI)        | P     |
| <b>Gender</b>                  |                   |       |                   |       |
| Female                         | 1.00              | -     | 1.00              |       |
| Male                           | 1.14 (0.60, 2.18) | .6859 | 1.20 (0.63, 2.28) | .5773 |
| <b>Smoking history</b>         |                   |       |                   |       |
| Current smoker                 | 1.00              |       | 1.00              |       |
| Never smoked                   | 1.10 (0.33, 3.68) | .8737 | 0.39 (0.15, 1.05) | .1791 |
| Former smoker                  | 1.05 (0.30, 3.68) | .9391 | 0.46 (0.17, 1.31) | .1472 |
| <b>ECOG performance status</b> |                   |       |                   |       |
| 1,2                            | 1.00              |       | 1.00              |       |
| 0                              | 0.67 (0.35, 1.27) | .2156 | 0.78 (0.41, 1.49) | .4554 |
| <b>Treatment</b>               |                   |       |                   |       |
| Chemotherapy                   | 1.00              |       | 1.00              |       |
| Erlotinib                      | 0.48 (0.25, 0.93) | .0265 | 1.28 (0.69, 2.35) | .4321 |
| <b>Bone metastasis</b>         |                   |       |                   |       |
| No                             | 1.00              |       | 1.00              |       |
| Yes                            | 1.50 (0.77, 2.92) | .2298 | 1.19 (0.60, 2.38) | .6178 |
| <b>Brain metastasis</b>        |                   |       |                   |       |
| No                             | 1.00              |       | 1.00              |       |
| Yes                            | 2.31 (0.89, 5.97) | .0749 | 2.66 (1.10, 6.43) | .0293 |
| <b>Type of EGFR mutation</b>   |                   |       |                   |       |
| del19                          | 1.00              |       | 1.00              |       |
| L858R                          | 0.69(0.36, 1.30)  | .2467 | 0.87(0.46, 1.64)  | .6659 |
| <b>BIM expression</b>          |                   |       |                   |       |
| Low/intermediate               | 1.00              |       | 1.00              |       |
| High                           | 0.40 (0.20, 0.80) | .0095 | 0.39 (0.19, 0.82) | .0124 |

**Supplementary Table 3.** Primers and probes used for gene expression analyses

| GENES          | REFSEQ       |   | PRIMERS                        | PROBES                              |
|----------------|--------------|---|--------------------------------|-------------------------------------|
| <i>β-actin</i> | NM_001101.3  | F | 5' TGAGCGCGGCTACAGCTT 3'       | 6FAM 5' ACCACCACGGCCGAGCGG 3' TAMRA |
|                |              | R | 5' TCCTTAATGTCACGCACGATTT 3'   |                                     |
| <i>MTOR</i>    | NM_004958    | F | 5' AGGCCGCATTGTCTCTATCAA 3'    | 6FAM 5' TGCAATCCAGCTGTTTG 3' MGB    |
|                |              | R | 5' GCAGTAAATGCAGGTAGTCATCCA 3' |                                     |
| <i>DGKA</i>    | NM_001345    | F | 5' CCCAGTGATTTTGCCAGC 3'       | 6FAM 5' AATACTCCACCAAAAAG 3' MGB    |
|                |              | R | 5' CCATCCTCGAAGAGCTTTAGGA3'    |                                     |
| <i>PDE4A</i>   | NM_001111307 | F | 5' GGAGACCATGCAGACCTATCG 3'    | 6FAM 5' TGGCCTCGCACAAGT 3' MGB      |
|                |              | R | 5' GCTCACGGTTCAACATCCTTTT3'    |                                     |
| <i>PDE4D</i>   | NM_001104631 | F | 5' ATCATCCTGGTGTGTCCAATCA 3'   | 6FAM 5' TCTGATCAATACAAACTCT 3' MGB  |
|                |              | R | 5' GGAATCATTGTACATCAAGGCAAGT3' |                                     |

## Supplementary Figures:

### Supplementary Figure 1:

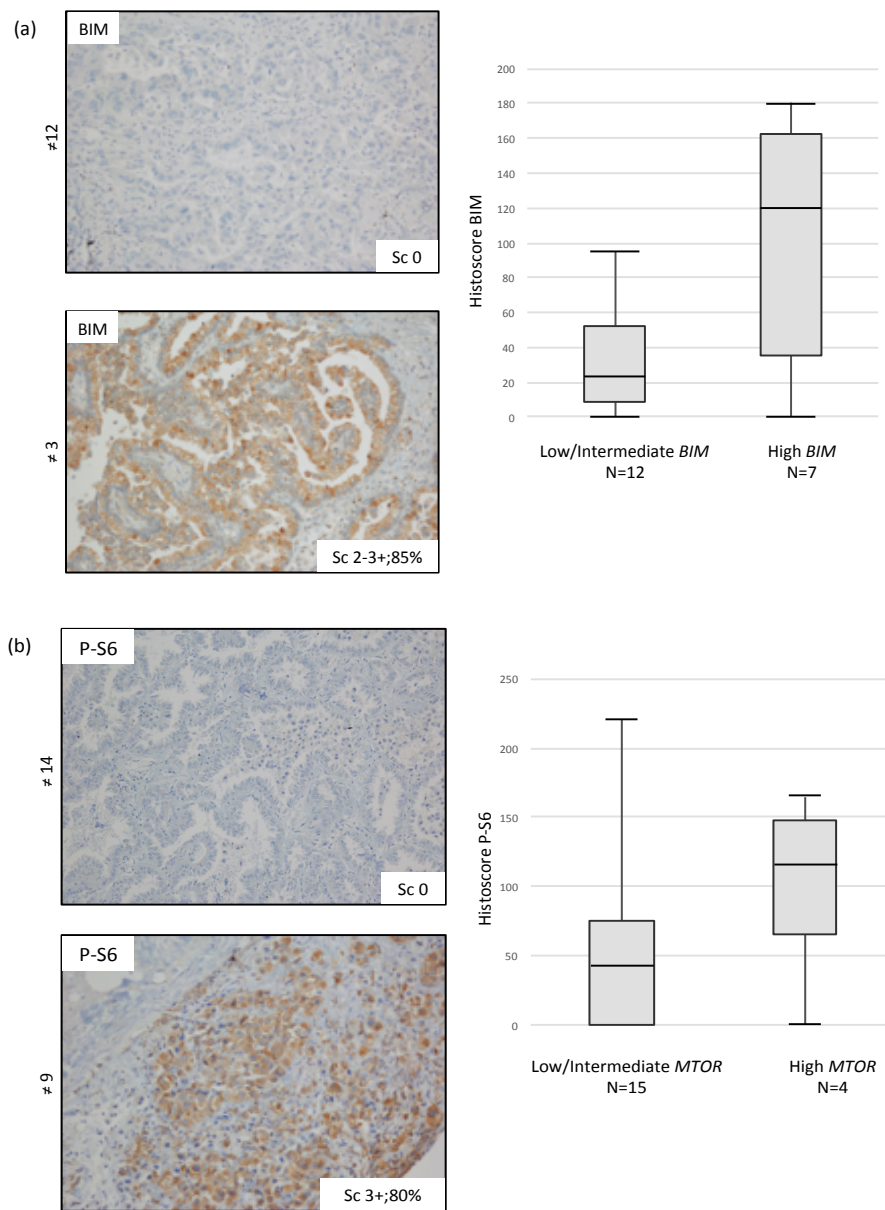

### Examples of immunohistochemical analysis and correlation between mRNA and

**protein expression. (a).** Left: Representative cases of BIM protein expression. BIM

staining was considered positive when either strong (3+) or moderate (+2)

cytoplasmic staining was observed (scale bar 100 $\mu$ m). Representative IHC staining

images for a negative case (score 0; Sc 0) and a positive case (score 2-3+ in 85%

of the cells; Sc 2-3+). Right: The correlation between BIM protein and mRNA

expression is presented by box- and -whisker plots. Medians, interquartile, maximum and minimum are shown. Though not statistically significant a trend for a positive correlation was found between *BIM* mRNA and protein expression (Wilcoxon test two-side *P* value = .1161). **(b).** Representative cases of P-S6 protein expression with anti-p-S6 (Ser240/244). P-S6 staining was considered positive when only strong (3+) cytoplasmic staining was observed (scale bar 100µm). Representative IHC staining images for a negative case (score 0; Sc 0) and a positive case (score 3+ in 80% of the cells; Sc 3+). Right: The correlation between P-S6 protein and *MTOR* mRNA expression is presented by box- and -whisker plots. Medians, interquartile, maximum and minimum are shown. Though not statistically significant a trend for a positive correlation was found between *MTOR* mRNA and P-S6 protein expression (Wilcoxon test two-side *P* value = .4048).

**Supplementary Figure 2:**

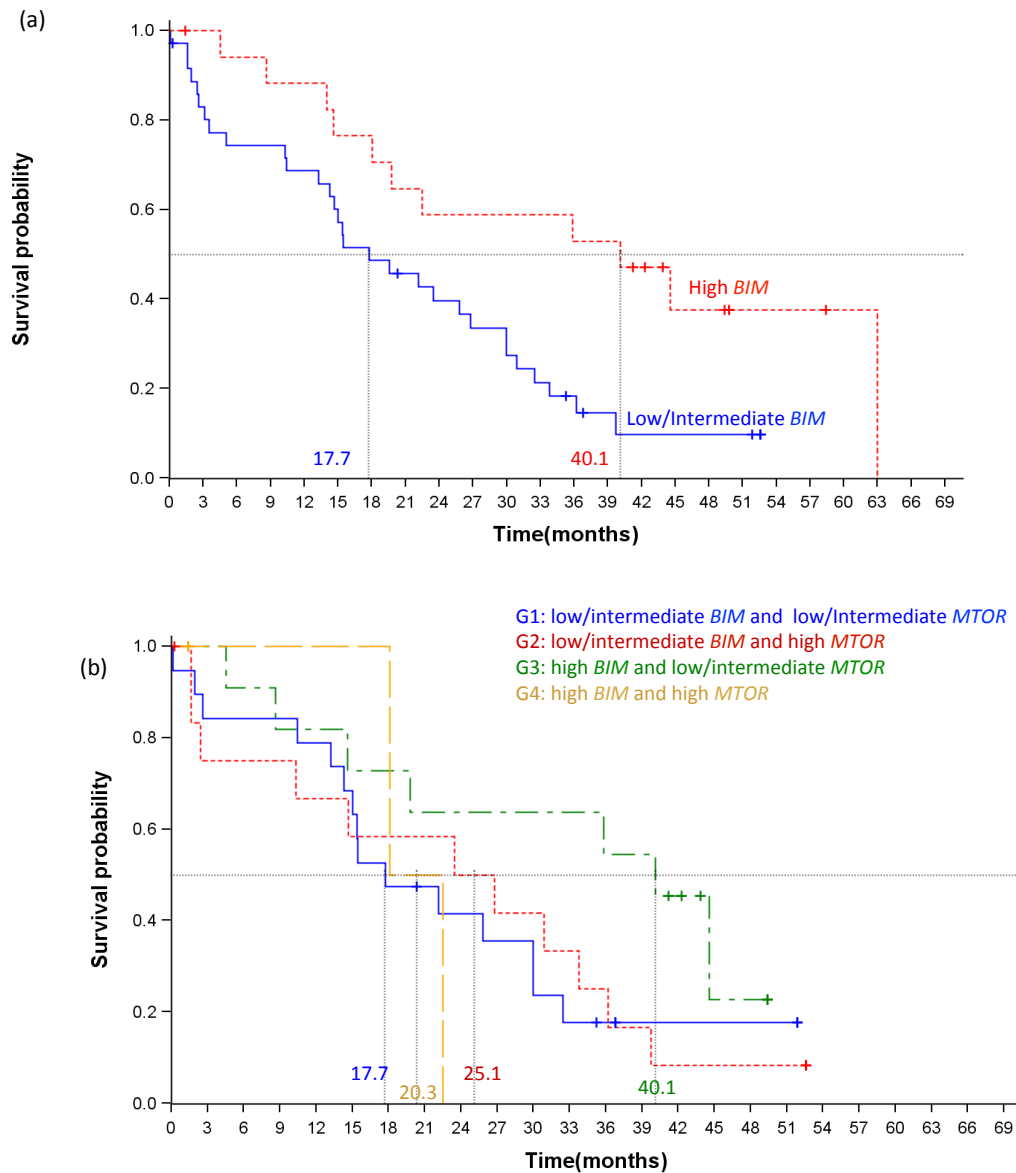

**Overall survival, according to *BIM* and *MTOR* mRNA expression levels for the training cohort of patients from the EURTAC study. (a).** Overall survival according to *BIM* mRNA levels for all the 57 *EGFR*-mutant NSCLC patients included in the present analysis. OS was 40.1 months (95%CI 14.6-63.0) for the 36 patients with high *BIM* (red line) and 17.7 months (95%CI 13.2-26.8) for the 18 patients with low/intermediate *BIM* mRNA expression (blue line);  $P=.010$ . **(b).** Overall survival by *BIM* and *MTOR* mRNA levels for the 46 *EGFR*-mutant NSCLC patients of the

training cohort in whom both *BIM* and *MTOR* mRNA evaluation was possible. Median OS was 17.7 (95%CI 13.3-30), for 19 patients (G1) with low/intermediate both *BIM* and *MTOR* and 25.1 months (95%CI 1.6-36.2) for the 13 patients (G2) with low/intermediate *BIM* and high *MTOR*. Median OS was 40.1 months (95%CI 8.6-NR) for 11 patients (G3) with high *BIM* and low/intermediate *MTOR* and 20.3 months (95%CI 18.1-22.5) for three patients (G4) with high both *BIM* and *MTOR*;  $P=.2497$ . Note Supplementary Figure 2: *BIM* expression levels were divided into high ( $>2.96$ ) and low ( $<1.83$ ) or intermediate (1.83-2.96). *MTOR* expression levels were divided into high ( $>1.97$ ) and low ( $<0.91$ ) or intermediate (0.91-1.97).



### Supplementary Figure 3:

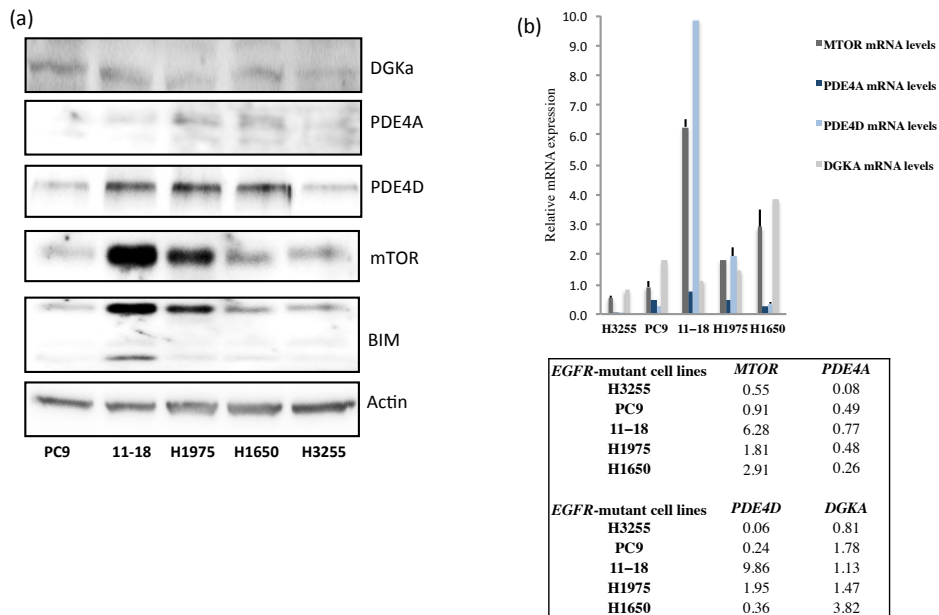

#### Correlation of MTOR expression with the expression of DGKA and PDE4. (a).

mTOR and DGKa, PDE4A and PDE4D expression in *EGFR*-mutant lung adenocarcinoma cell lines. Cell lysates were collected and probed with anti-mTOR and anti-DGKa, anti-PDE4A anti-PDE4D antibodies. Actin was used as the loading control. The protein levels of PDE4D and mTOR are similarly increased in 11-18, H1975 and H1650 cells. (b). *MTOR*, *DGKA*, *PDE4A* and *PDE4D* mRNA expression in *EGFR*-mutant lung adenocarcinoma cell lines by qRT-PCR normalized to  $\beta$ -actin. Correlation between the four biomarkers was assessed using Pearson's correlation analysis. There was a significant positive correlation between *MTOR* and *PDE4D* mRNA expression ( $r=0.92$ ,  $P=.0244$ ). Pearson correlation coefficients ( $r$ ) of 0.75 ( $P=.1418$ ) and 0.05 ( $P=.09413$ ) were found between *MTOR* and *PDE4A* and *MTOR* and *DGKA*, respectively. Values are the mean  $\pm$  standard deviation of triplicate experiments. Error bars indicate the standard deviation.
